# Supplementary material for: Interfacial Co–O–Cu bonds prompt electrochemical nitrate reduction to ammonia in neutral electrolyte
Source: Royal Society of Chemistry journal article supplement (doi:10.1039/d3cc05801h), 2024-01-01
Supplement: d3cc05801h1.pdf [file d3cc05801h1.pdf]

**Electronic Supplementary Information (ESI) for:**  
**Interfacial Co-O-Cu bonds prompt electrochemical nitrate  
reduction to ammonia in neutral electrolyte**

Kai Yao,<sup>a</sup> Zhaobin Fang,<sup>a</sup> Weijie Yan,<sup>a</sup> Yawu Wang,<sup>a</sup> Zhenyong Song,<sup>a</sup> Wenhai Wang,<sup>a</sup> Jieyue Wang,<sup>a</sup> Xianwen Wei,<sup>a</sup> Yiwei Tan,<sup>c</sup> Dehong Wu,<sup>b\*</sup> Konglin Wu,<sup>a\*</sup> and Binbin Jiang<sup>d\*</sup>

a. Institute of Clean Energy and Advanced Nanocatalysis (iClean), Anhui International Joint Research Center for Green Manufacturing and Biotechnology of Energy Materials, School of Chemistry and Chemical Engineering, Anhui University of Technology, Maanshan 243032, China. E-mail: [klwuchem@ahut.edu.cn](mailto:klwuchem@ahut.edu.cn)

b. Emergency Management Bureau of Jiangan County, Yibin 644200, China. E-mail: [wudehong511523@163.com](mailto:wudehong511523@163.com)

c. State Key Laboratory of Materials-Oriented Chemical Engineering, Nanjing University of Technology, Nanjing 211816, China

d. School of Chemistry and Chemical Engineering, Anqing Normal University, Anqing 246001, China. E-mail: [jiangbb@aqnu.edu.cn](mailto:jiangbb@aqnu.edu.cn)

## **1. Experimental section**

### **1.1 Chemicals and materials**

Cu(NO<sub>3</sub>)<sub>2</sub>·6H<sub>2</sub>O, Co(NO<sub>3</sub>)<sub>2</sub>·6H<sub>2</sub>O, NaNO<sub>3</sub>, Na<sub>2</sub>SO<sub>4</sub> and 2-Methylimidazole were purchased from Aladdin Industrial Corporation. The other chemical reagents were analytical reagent grade without further purification.

### **1.2 Synthesis of Cu(OH)<sub>2</sub> and Co(OH)<sub>2</sub>**

The 22 mL NaOH solution (0.1 M) was added into 10 mL CuCl<sub>2</sub>·2H<sub>2</sub>O (1 mmol) solution with continue stirring for 30 mins. After the blue precipitate is formed, the achieved products were washed with water and ethanol, and finally dried in a vacuum oven for 12 h. The Co(OH)<sub>2</sub> was achieved based on similar procedures.

### **1.3 Characterization**

The achieved nanocomposites were characterized by X-ray powder diffraction (XRD, Rigaku Ultima IV), Transmission electron microscopy (TEM, Hitachi H-7700), high resolution TEM (HRTEM), high angle annular dark field scanning transmission electron microscopy (HAADF-STEM) and elemental mapping by energy-dispersive X-ray spectrometry (EDS, JEOL JEM-2100F), X-ray photoelectron spectroscopy (XPS, Thermo Fisher Scientific ESCALAB 250Xi). The metal contents in achieved product were detected by ICP-OES (Agilent 720). The products were determined by Nuclear magnetic resonance hydrogen spectrum (<sup>1</sup>H NMR, AVANCE 400).

### **1.4 Electrochemical Measurement**

All electrochemical measurements were tested by CHI 660E electrochemical workstation via the three-electrode systems in a typical H-type electrolytic cell separated by a membrane. The catalyst located on carbon paper (1.0×1.0 cm<sup>2</sup>), saturated Ag/AgCl electrode and platinum wire were employed as the working electrode, reference electrode and counter electrode, respectively. The electrochemical experiments were conducted in 1.0 g·L<sup>-1</sup> Na<sub>2</sub>SO<sub>4</sub> solution (15 mL) without and with NaNO<sub>3</sub> (50 ppm). In this work, all electrochemical data was calculated vs. the reversible hydrogen electrode (RHE) according to the following the equation.  $E(\text{RHE}) = E(\text{Ag/AgCl}) + 0.059 \times \text{pH} + 0.197 \text{ V}$ . The double-layer capacitance was evaluated at overpotential from 0.25 V to 0.35 V vs. RHE at different scan rate in 1.0

$\text{g}\cdot\text{L}^{-1}$   $\text{Na}_2\text{SO}_4$  solution.

## **2. Determination of ion concentration**

The generated products were detected by ultraviolet-visible (UV-Vis) spectrophotometer with calibration curves. The specific detection methods are as follow:

### **2.1 Determination of nitrate-N**

Firstly, 1.0 ml electrolyte was diluted to 5 mL. Then, 0.1 mL HCl (1 M) and 0.01 mL sulfamic acid solution (0.8 wt%) were added into the above solution. The absorption spectrum was measured by using an ultraviolet-visible spectrophotometer and the absorption intensities at a wavelength of 220 nm and 275 nm. The final absorption value was calculated by following equation:  $A = A_{220\text{nm}} - 2A_{275\text{nm}}$ . The concentration-absorbance curve was achieved by using the standard potassium nitrate solutions.

### **2.2 Determination of nitrite-N**

The color developer was configured as follows: *p*-aminobenzenesulfonamide (20 g) was added to a mixed solution of 250 mL of ultrapure water and 50 mL of phosphoric acid ( $\rho=1.70 \text{ g}\cdot\text{mL}^{-1}$ ), and then N-(1-Naphthyl)ethylenediamine dihydrochloride (1.0 g) was dissolved in the above solution. Finally, the above solution was transferred to a 500 mL volumetric flask and diluted to the mark. 1.0 mL electrolyte was diluted to 5 mL. Next, 0.1 mL color reagent was added into the aforementioned 5 mL solution. After shanking and standing for 20 minutes, the absorbance was tested by UV-Vis spectrophotometry at 540 nm. The concentration-absorbance curve was calibrated by using the standard sodium nitrite solutions.

### **2.3 Determination of ammonia-N**

The produced ammonia was spectrophotometrically determined by the indophenol blue method. Typically, 1.0 mL electrolyte was diluted to 5 mL. Afterwards, 2 mL (1.0 M NaOH) containing 5 wt% salicylic acid and 5 wt% sodium citrate was added, followed by 1 ml NaClO solution (0.05 M) and 0.2 mL sodium nitroferricyanide (1 wt%) were added. After standing at room temperature for 2h, the UV-Vis absorption spectrum was collected at a wave-length of 655 nm. The concentration-absorbance curve was calibrated by using standard  $\text{NH}_4\text{Cl}$  solution for a series of concentrations.

The concentration-absorbance curve was calibrated can be obtained through NH<sub>4</sub>Cl solutions and the NH<sub>4</sub>Cl chloride crystal, which was dried at 105 °C for 2 h in advance.

#### 2.4 Calculation of the yield, selectivity, and Faradaic efficiency

The potential (vs. saturated Ag/AgCl) was converted to RHE by using the following equations:

$$E_{\text{RHE}} = E_{\text{Ag/AgCl}} + 0.0592 \text{ pH} + E^0_{\text{Ag/AgCl}}$$

The conversion of NO<sub>3</sub><sup>-</sup> was calculated as follows:

$$C_{\text{NO}_3^-} = \Delta C_{\text{NO}_3^-} / C_0 \times 100\%$$

The selectivity of ammonia was calculated using the equations:

$$S_{\text{NH}_3} = C_{\text{NH}_3} / \Delta C_{\text{NO}_3^-} \times 100\%$$

The yield of NH<sub>3</sub> was calculated using the equations:

$$Y_{\text{NH}_3} = (C_{\text{NH}_3} \times V) / (t \times m_{\text{cat}})$$

The Faradaic efficiency was calculated using the equations:

$$FE = (8F \times C_{\text{NH}_3} \times V) / (M_{\text{NH}_3} \times Q) \times 100\%$$

In these equations,  $E^0_{\text{Ag/AgCl}} = 0.197 \text{ V}$ ,  $\Delta C_{\text{NO}_3^-}$  is the concentration difference of NO<sub>3</sub><sup>-</sup> before and after electrolysis,  $C_0$  is the initial concentration of NO<sub>3</sub><sup>-</sup>,  $C_{\text{NH}_3}$  is the generated concentration of ammonia,  $V$  is the electrolyte volume of cathode cell,  $t$  is the electrolysis time,  $m_{\text{cat}}$  is the mass of catalyst,  $FE$  is the faradaic efficiency of product,  $F$  is the Faradaic constant (96,485 C mol<sup>-1</sup>),  $M_{\text{NH}_3}$  is the molar mass of NH<sub>3</sub>,  $Q$  is the total charge (C) passing the electrolytic cell.

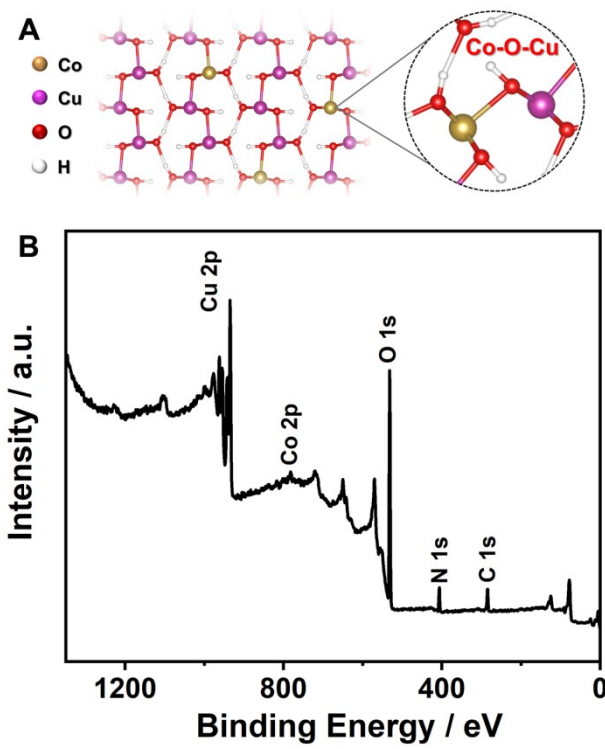

**Fig. S1** (A) The structure and (B) full XPS spectrum of  $\text{Co}_2\text{-Cu(OH)}_2$ .

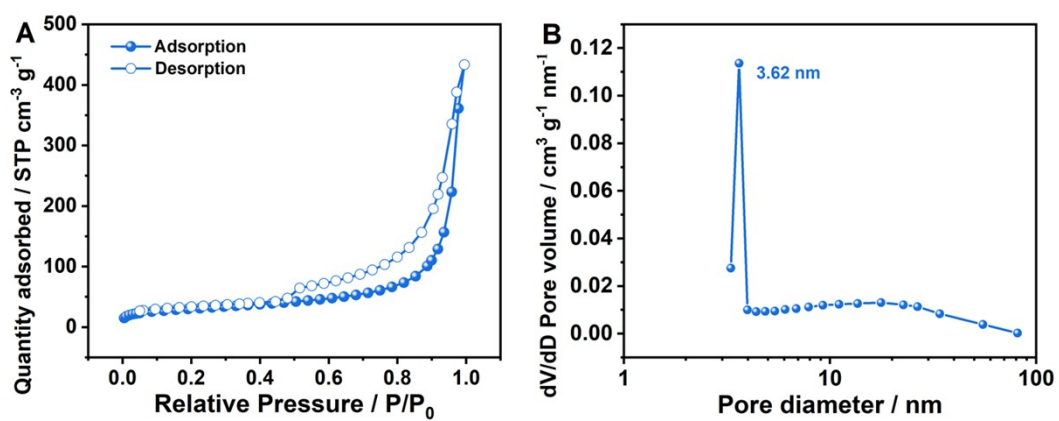

**Fig. S2** (A) N<sub>2</sub> adsorption-desorption isotherms of  $\text{Co}_2\text{-Cu(OH)}_2$ , (B) Aperture distribution curve of  $\text{Co}_2\text{-Cu(OH)}_2$ .

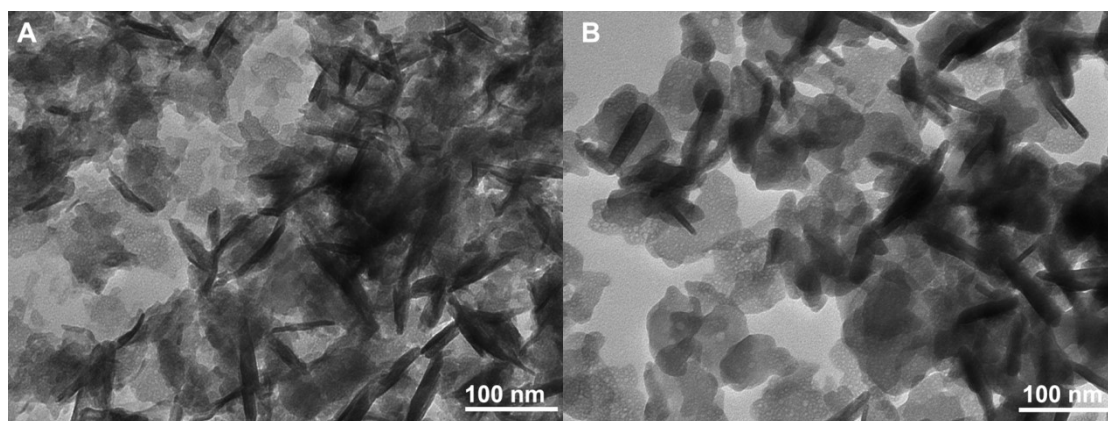

**Fig. S3** (A) TEM image of Co<sub>1</sub>-Cu(OH)<sub>2</sub> and (B) TEM image of Co<sub>3</sub>-Cu(OH)<sub>2</sub>.

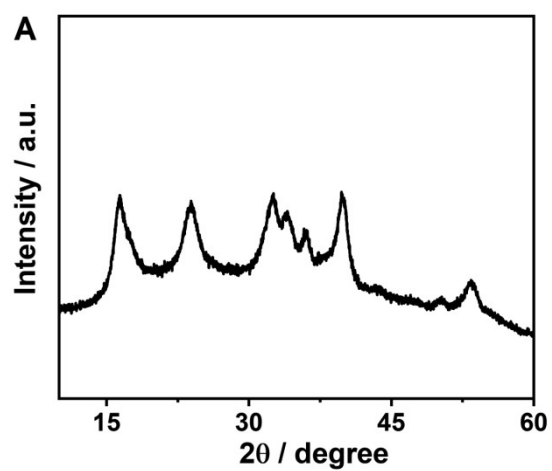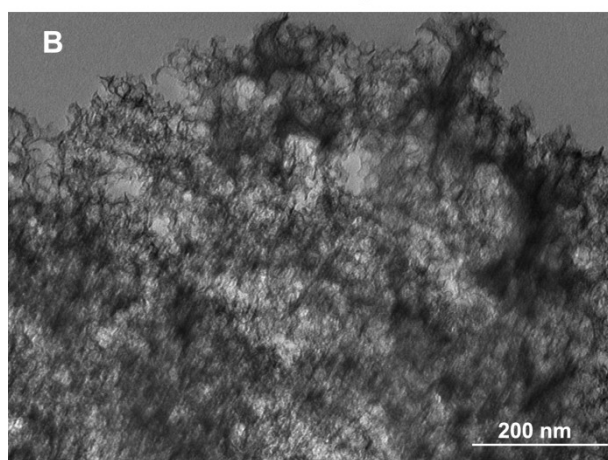

**Fig. S4** (A) XRD pattern and (B) TEM image of  $\text{Cu}(\text{OH})_2$ .



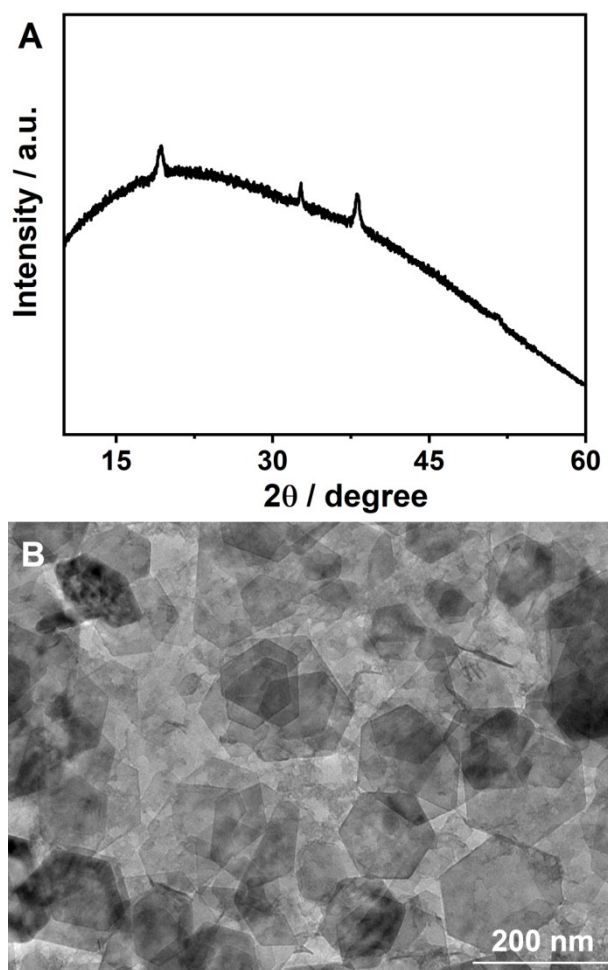

**Fig. S5** (A) XRD patterns and (B) TEM image of  $\text{Co(OH)}_2$ .

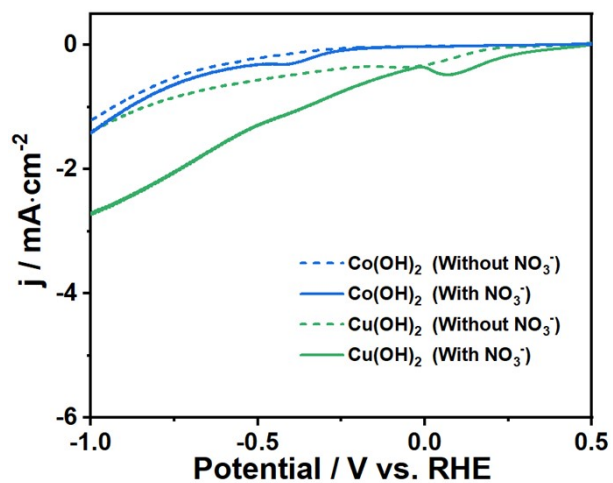

**Fig. S6** The LSV curves of Cu(OH)<sub>2</sub> and Co(OH)<sub>2</sub> with (solid lines) and without (dash line) NaNO<sub>3</sub> in Na<sub>2</sub>SO<sub>4</sub> solution.

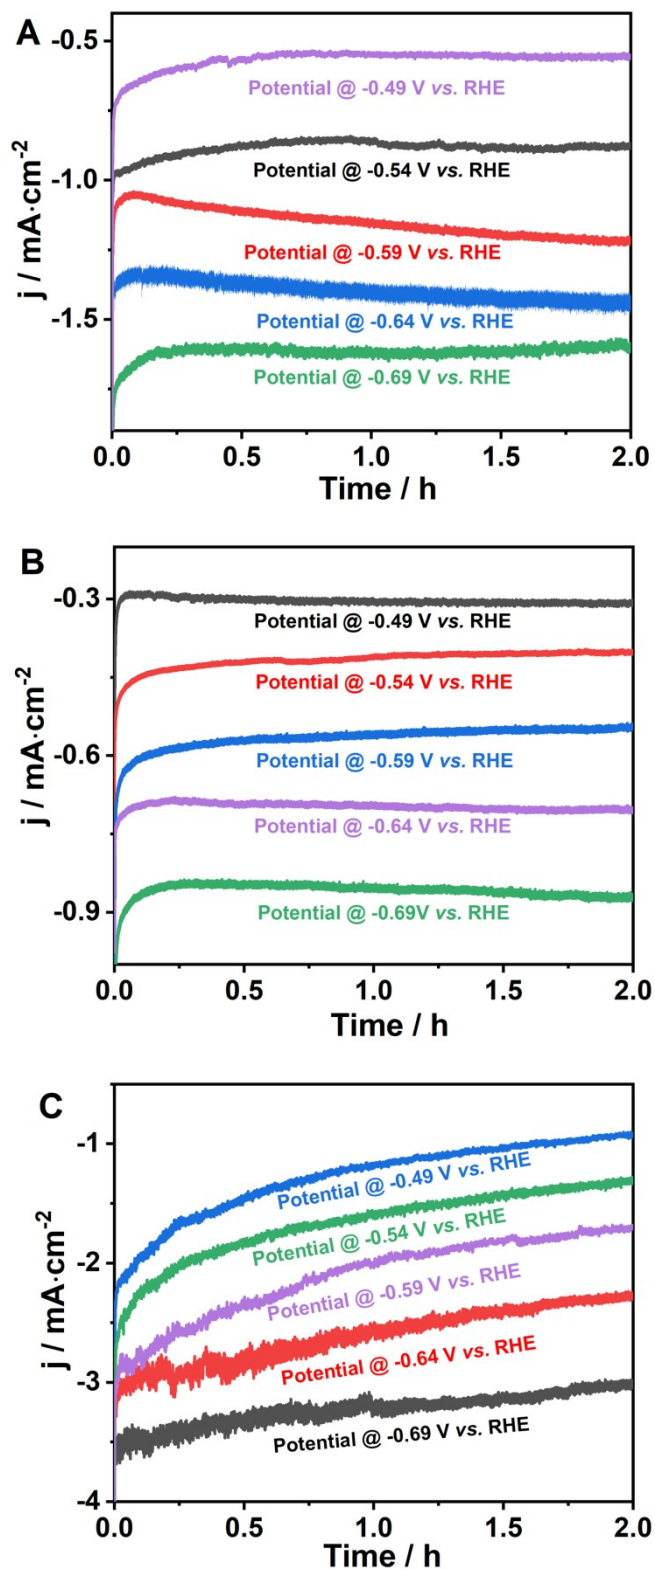

Fig. S7 The  $i$ - $t$  curves of (A)  $\text{Cu}(\text{OH})_2$ , (B)  $\text{Co}(\text{OH})_2$  and (C)  $\text{Co}_2\text{-Cu}(\text{OH})_2$  at different potential.

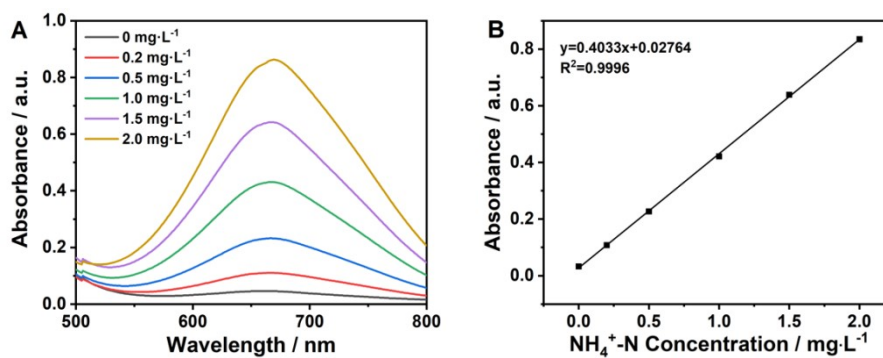

**Fig. S8** (A) The UV-Vis absorption spectra of  $\text{NH}_4\text{Cl}$  solutions with different concentrations, (B) the standard calibration curve for the determination of ammonia.

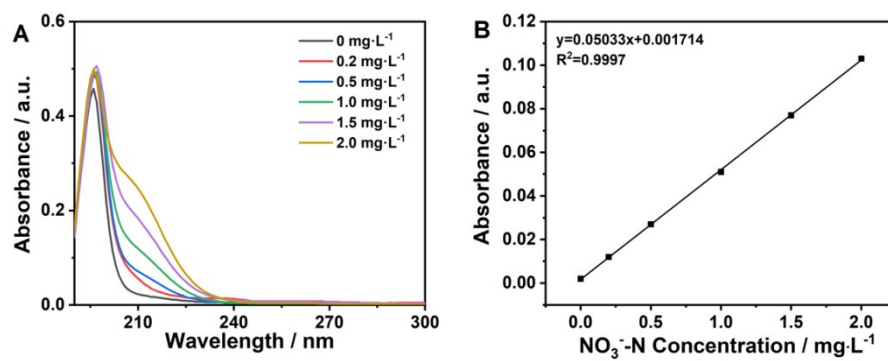

**Fig. S9** (A) The UV-Vis absorption spectra of NaNO<sub>3</sub> solutions with different concentrations, (B) the standard calibration curve for the determination of NO<sub>3</sub><sup>-</sup>-N.

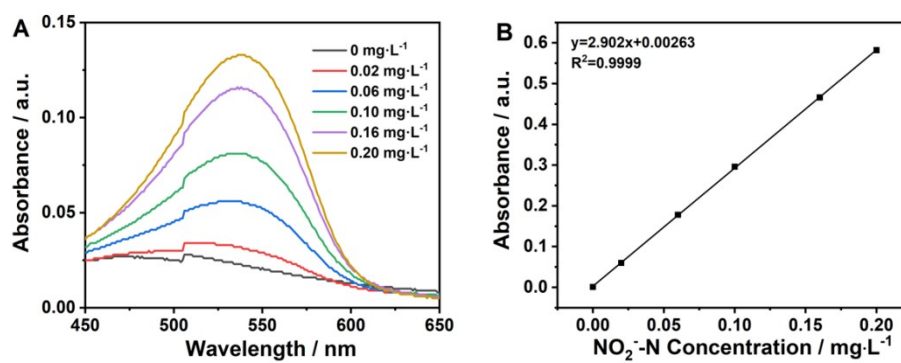

**Fig. S10** (A) The UV-Vis absorption spectra of NaNO<sub>2</sub> solutions with different concentrations, (B) the standard calibration curve for the determination of NO<sub>2</sub><sup>-</sup>-N.

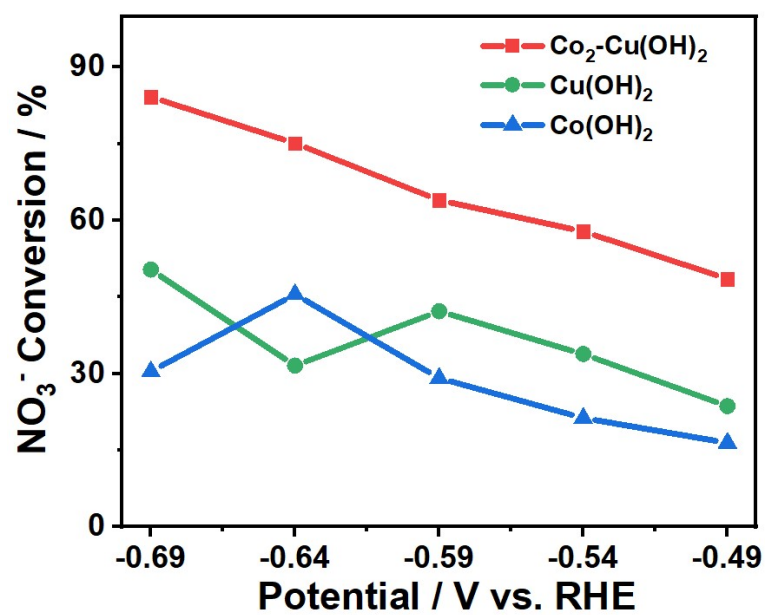

**Fig. S11.** The NO<sub>3</sub><sup>-</sup> conversion rate of Co<sub>2</sub>-Cu(OH)<sub>2</sub>, Cu(OH)<sub>2</sub> and Co(OH)<sub>2</sub> at different given potential.

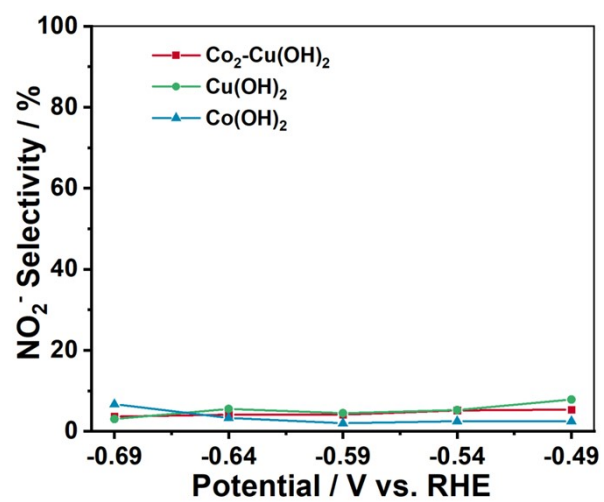

Fig. S12. The  $\text{NO}_2^-$  selectivity of  $\text{Co}_2\text{-Cu(OH)}_2$ ,  $\text{Cu(OH)}_2$  and  $\text{Co(OH)}_2$ .



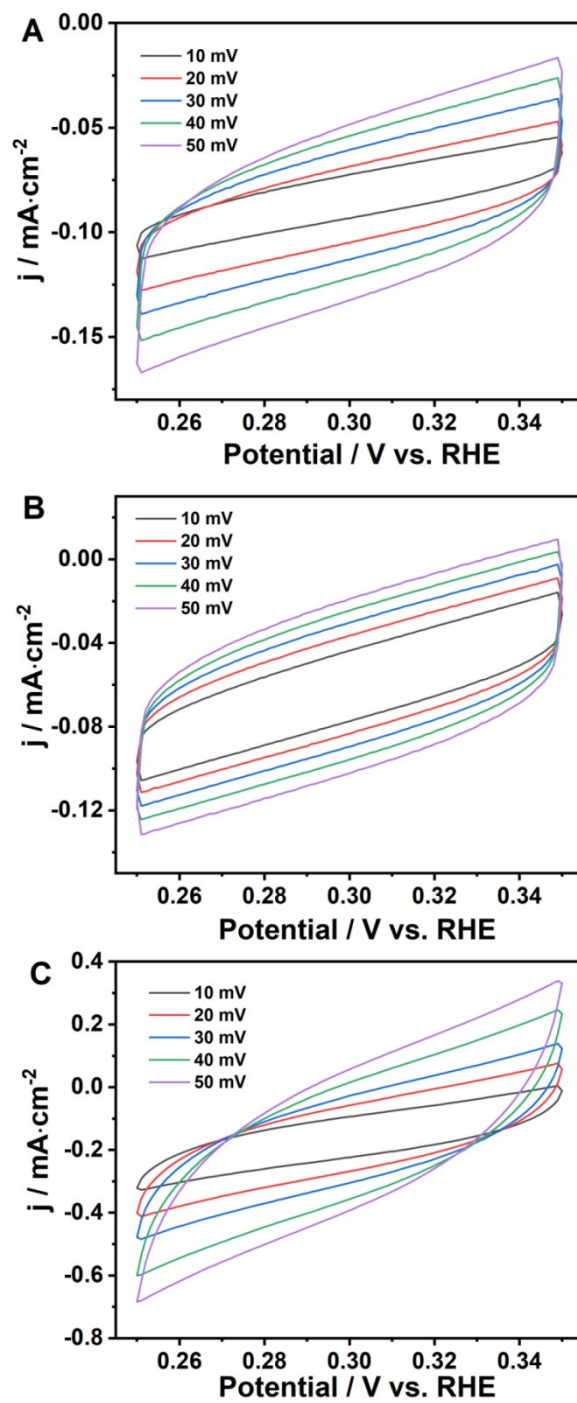

**Fig. S13** The CV curves of (A)  $\text{Cu(OH)}_2$ , (B)  $\text{Co(OH)}_2$  and (C)  $\text{Co}_2\text{-Cu(OH)}_2$  at different scan rates.

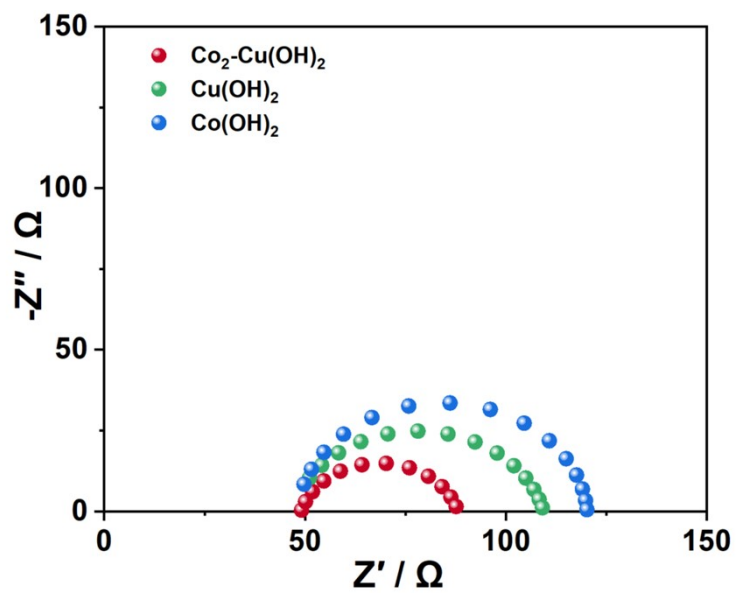

Fig. S14. The Nyquist plots of  $\text{Co}_2\text{-Cu(OH)}_2$ ,  $\text{Cu(OH)}_2$  and  $\text{Co(OH)}_2$

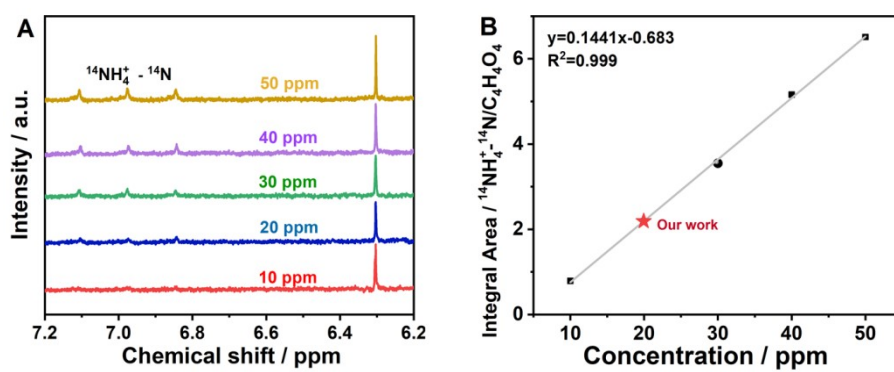

**Fig. S15** (A)  $^1\text{H}$  NMR spectra of the standard  $^{14}\text{NH}_4^+$  solutions with different concentrations; (B) The standard curve of integral area ( $^{14}\text{NH}_4^+ - ^{14}\text{N} / \text{C}_4\text{H}_4\text{O}_4$ ) against  $^{14}\text{NH}_4^+ - ^{14}\text{N}$  concentration.

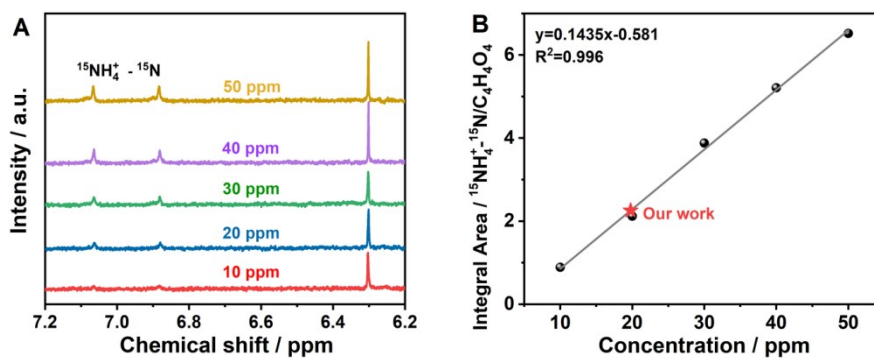

**Fig. S16** (A)  $^1\text{H}$  NMR spectra of the standard  $^{15}\text{NH}_4^+$  solutions with different concentrations and (B) The standard curve of integral area ( $^{15}\text{NH}_4^+ - ^{15}\text{N} / \text{C}_4\text{H}_4\text{O}_4$ ) against  $^{15}\text{NH}_4^+ - ^{15}\text{N}$  concentration

**Table S1.** Comparison of ammonium synthesis from nitrate electroreduction over  $\text{Co}_2\text{-Cu(OH)}_2$  with other reported catalysis.

| Catalysis                             | Electrolyte                                                              | $Y_{\text{NH}_3}$                                                    | $S_{\text{NH}_3}$ | $\text{FE}_{\text{NH}_3}$ | Ref.      |
|---------------------------------------|--------------------------------------------------------------------------|----------------------------------------------------------------------|-------------------|---------------------------|-----------|
| $\text{Co}_2\text{-Cu(OH)}_2$         | 50 ppm $\text{NaNO}_3$ + 1.0 g $\text{L}^{-1}$ $\text{Na}_2\text{SO}_4$  | $223.7 \mu\text{g} \cdot \text{h}^{-1} \text{mg}_{\text{cat}}^{-1}$  | 93.2%             | 91.6%                     | This work |
| $\text{Co}_3\text{O}_4$               | 1600 mM $\text{NO}_3^-$ + 0.1 M $\text{K}_2\text{SO}_4$                  | $0.854 \text{ mmol h}^{-1} \text{cm}^{-2}$                           | 33.6%             |                           | 1         |
| $\text{Co}_3\text{O}_4@\text{NiO}$    | 200 ppm $\text{NO}_3^-$ + 0.5 M $\text{Na}_2\text{SO}_4$                 | $0.00693 \text{ mmol h}^{-1} \text{mg}_{\text{cat}}^{-1}$            | 62.29%            | 54.97%                    | 2         |
| 10Cu/TiO <sub>2-x</sub>               | 200 ppm $\text{NO}_3^-$ + 0.5 M $\text{Na}_2\text{SO}_4$                 | $0.1143 \text{ mmol h}^{-1} \text{cm}^{-2}$                          | 73.56%            | 81.34%                    | 3         |
| PdBP NAs/NF                           | 100 ppm $\text{NO}_3^-$ + 0.5 M $\text{K}_2\text{SO}_4$                  | $0.11 \text{ mmol h}^{-1} \text{cm}^{-2}$                            | 88.44 %           | 64.73 %                   | 4         |
| $\text{Cu}_{0.25}\text{Ni}_{0.25}$    | 1 M KOH+ 75 mM $\text{NO}_3^-$                                           | $0.5496 \text{ mmol h}^{-1} \text{cm}^{-2}$                          | 65.0%             | 94.5%                     | 5         |
| Co/CoO NAs                            | 0.1 M $\text{Na}_2\text{SO}_4$ + 3.2 mM $\text{NO}_3^-$                  | $0.1940 \text{ mmol h}^{-1} \text{cm}^{-2}$                          | 91.2%             | 93.8%                     | 6         |
| $\text{Cu}_3\text{Pd}_1$              | 0.5 M $\text{K}_2\text{SO}_4$ + 50 ppm $\text{NO}_3^-$                   | $784.37 \mu\text{g} \cdot \text{h}^{-1} \text{mg}_{\text{cat}}^{-1}$ | 77.49%            | 90.02%                    | 7         |
| $\text{Fe}_3\text{C/NC}$              | 1 M KOH + 75 mM $\text{NO}_3^-$                                          | $1.19 \text{ mmol h}^{-1} \text{mg}^{-1}$                            | 79%               | 96.7%                     | 8         |
| $\text{CuO-CO}_3\text{O}_4/\text{Ti}$ | 100 mg $\text{L}^{-1}$ $\text{NO}_3^-$ + 0.05 M $\text{Na}_2\text{SO}_4$ |                                                                      | 44%               | 54.5%                     | 99        |
| $\text{Ni}_1\text{Fe}_1$ hydroxide    | 200 ppm $\text{NO}_3^-$ + 0.1 M $\text{K}_2\text{SO}_4$                  | $0.216 \text{ mmol h}^{-1} \text{cm}^{-2}$                           | 91.3%             |                           | 100       |
| $\text{Cu}_{40}\text{Co}_1$           | 200 ppm $\text{NO}_3^-$ + 0.1 M $\text{K}_2\text{SO}_4$                  |                                                                      | 97%               | 95%                       | 11        |
| $\text{Cu}_5\text{Co}_5/\text{OMC}$   | 500 ppm $\text{KNO}_3$ + 0.1 M PBS                                       | $282.9 \mu\text{g} \cdot \text{h}^{-1} \text{mg}_{\text{cat}}^{-1}$  |                   | 74.2%                     | 12        |
| $\text{CuCoSP}$                       | 100 ppm $\text{NO}_3^-$ + 0.1 M KOH                                      | $1.17 \text{ mmol h}^{-1} \text{cm}^{-2}$                            |                   | 93.3%                     | 13        |
| $\text{CuCl\_BEF}$                    | 100 ppm $\text{NO}_3^-$ + 0.5 M $\text{Na}_2\text{SO}_4$                 | $64.4 \text{ h}^{-1}$                                                | 98.6%             |                           | 14        |

## Reference

1. Y. Wang, Y. Yu, R. Jia, C. Zhang and B. Zhang, *Natl. Sci. Rev.*, 2019, **6**, 730.
2. Y. Wang, C. Liu, B. Zhang and Y. Yu, *Sci. China Mater.*, 2020, **63**, 2530.
3. X. Zhang, C. H. Wang, Y. Guo, B. Zhang, Y. T. Wang and Y. F. Yu, *J. Mater. Chem. A.*, 2022, **10**, 6448.
4. Y. Xu, Y. W. Sheng, M. Z. Wang, T. T. Liu, H. J. Yu, K. Deng, Z. Q. Wang, L. Wang and H. J. Wang, *J. Mater. Chem. A.*, 2022, **10**, 16290.
5. J. Wang, L. L. Zhang, Y. Y. Wang, Y. J. Niu, D. Fang, Q. X. Su and C. Wang, *Dalton Trans.*, 2022, **51**, 15111.
6. Y. Yu, C. Wang, Y. Yu, Y. Wang and B. Zhang, *Sci. China Chem.*, 2020, **63**, 1469.
7. Y. Xu, K. Ren, T. Ren, M. Wang, M. Liu, Z. Wang, X. Li, L. Wang and H. Wang, *Chem. Commun.*, 2021, **57**, 7525.
8. Y. Y. Wang, L. L. Zhang, Y. J. Niu, D. Fang, J. Wang, Q. X. Su and C. Wang, *Green Chem.*, 2021, **23**, 7594.
9. M. Yang, J. Wang, C. Shuang, A. Li, *Chemosphere.*, 2020, **255**, 126970.
10. X. Wu, A. J. Ma, J. Hu, D. Liu, A. T. Kuvarega, B. B. Mambad and J. Z. Gui, *Inorg. Chem. Front.*, 2023, **10**, 666.
11. C. H. Wang, Z. Y. Liu, L. Q. Dong, F. Du, J. S. Li, C. J. Chen, R. G. Ma, C. M. Li, C. X. Guo, *J. Power Source.*, 2023, **556**, 232523.
12. J. Zhao, L. J. Liu, Y. Yang, D. Liu, X. B. Peng, S. J. Liang and L. L. Jiang, *ACS Sustainable Chem. Eng.*, 2023, **11**, 6, 2468.
13. W. H. He, J. Zhang, S. Dieckhöfer, S. Varhade, A. C. Brix, A. Lielpetere, S. Seisel, J. R. C. Junqueira and W. Schuhmann, *Nat. Commun.*, 2022, **13**, 1129.
14. W. J. Sun, H. Q. Ji, L. X. Li, H. Y. Zhang, Z. K. Wang, J. H. He and J. M. Lu, *Angew. Chem. Int. Ed.* 2021, **60**, 22933.
